# Supplementary material for: Discovery of highly potent antifungal triazoles by structure-based lead fusion
Source: Royal Society of Chemistry journal article supplement (doi:10.1039/c1md00103e), 2011-01-01
Supplement: c1md00103e.pdf [file c1md00103e.pdf]

## Supplementary Information

### Discovery of Highly Potent Antifungal Triazoles by Structure-based Lead Fusion

Wenya Wang, Shengzheng Wang, Guoqiang Dong, Yang Liu, Zizhao Guo, Zhenyuan  
Miao, Jianzhong Yao, Wannian Zhang\* and Chunquan Sheng\*

*Department of Medicinal Chemistry, School of Pharmacy, Second Military Medical  
University, 325 Guohe Road, Shanghai 200433, China. For Prof. W. Zhang:  
Phone/Fax: (+86)21-81870243, E-mail: zhangwnk@hotmail.com; For Prof. C. Sheng:  
Phone/Fax: (+86)21-81871239, E-mail: shengcq@hotmail.com.*

**Table 1.** Comparison of Physicochemical Properties of Compound 10a and Azole Antifungal Agents<sup>a,b</sup>

| <b>compounds</b> | <b>AlogP</b> | <b>MW</b> | <b>HBA</b> | <b>HBD</b> | <b>Num-Rot<br/>bond</b> | <b>Molecular-Surface</b> | <b>PSA</b> |
|------------------|--------------|-----------|------------|------------|-------------------------|--------------------------|------------|
| 10a              | 2.699        | 428.48    | 5          | 1          | 8                       | 403.22                   | 63.41      |
| Fluconazole      | 0.75         | 306.27    | 5          | 1          | 5                       | 283.02                   | 81.65      |
| Itraconazole     | 6.057        | 691.61    | 9          | 0          | 11                      | 629.22                   | 100.79     |
| Posaconazole     | 5.096        | 700.78    | 9          | 1          | 12                      | 649.42                   | 111.79     |
| Voriconazole     | 2.071        | 349.31    | 5          | 1          | 5                       | 320.89                   | 76.72      |

[a] The physicochemical properties of the compounds were calculated by Discovery Studio 2.5

software package; [b] Abbreviations: MW = Molecular Weight; HBA = Hydrogen Bond Acceptor;

HBD = Hydrogen Bond Donor; Num-Rot bond = Number of Rotatable Bonds; PSA = Polar

Surface Area
